# Supplementary material for: Mimicking acute airway tissue damage using femtosecond laser nanosurgery in airway organoids
Source: Frontiers journal article supplement (doi:10.3389/fcell.2023.1268621), 2023-09-08
Supplement: Data_Sheet_1.PDF [file Data_Sheet_1.PDF]

## *Supplementary Material*

### **Mimicking acute airway tissue damage using femtosecond laser nanosurgery in airway organoids**

**Lara Gentemann<sup>1,2,3,\*</sup>, Sören Donath<sup>1,2</sup>, Anna E. Seidler<sup>1,2</sup>, Lara Patyk<sup>1,2</sup>, Manuela Buettner<sup>4</sup>, Alexander Heisterkamp<sup>1,2,3,5</sup>, Stefan Kalies<sup>1,2,3,5,\*</sup>**

<sup>1</sup>Institute of Quantum Optics, Leibniz University Hannover, Hannover, Germany

<sup>2</sup>Lower Saxony Center for Biomedical Engineering, Implant Research and Development, Hannover, Germany

<sup>3</sup>REBIRTH Research Center for Translational Regenerative Medicine, Hannover, Germany

<sup>4</sup>Institute for Laboratory Animal Science, Hannover Medical School, Hannover, Germany

<sup>5</sup>German Center for Lung Research (DZL), Gießen, Germany

\* **Correspondence:** [gentemann@iqo.uni-hannover.de](mailto:gentemann@iqo.uni-hannover.de) and [kalies@iqo.uni-hannover.de](mailto:kalies@iqo.uni-hannover.de)

#### **1 Supplementary Methods**

##### **1.1 Immunofluorescence of whole mount airway organoids**

Airway organoids grown on a glass-bottom dish ( $\mu$ -Dish 35 mm, high Grid-500 Glass, Ibidi, Germany) were washed with DPBS (Sigma Aldrich, MO, USA) three times followed by incubation with fixing solution (4 % paraformaldehyde in DPBS) for 30 minutes at RT. Subsequently, fixing solution was removed, organoids were washed with DPBS three times and incubated in permeabilization/quenching solution (125 mM glycine, 0.5 % Triton X-100 in DPBS) for 30 minutes at RT, followed by incubation in blocking solution (5 % FBS, 0.25 % Triton X-100, 0.5 % Tween-20 in DPBS) for 1 hour at RT. Subsequently, organoids were incubated with primary antibody diluted in blocking solution for 1 hour at RT and then overnight at 4 °C. The next day, organoids were washed with DPBS three times for 5-10 minutes each, followed by incubation with secondary antibody diluted in blocking solution for 2 hours at RT in the dark. Finally, organoids were washed with DPBS three times for 5-10 minutes each. Stained organoids were covered with DPBS and analyzed using a confocal laser scanning microscope (Leica TCS SP5). Primary antibodies: mouse-anti-acetylated-alpha-tubulin (1:200 6-11B-1, Santa Cruz Biotechnology), mouse-anti-CK5 (1:200 2C2, Invitrogen), rat-anti-CK8 (1:100 TROMA-I, DSHB), rabbit-anti-p63 (1:200 Poly6190, BioLegend); secondary antibodies: m-IgG-kappa-BP-CFL-488 (1:200, Santa Cruz Biotechnology), donkey-anti-rat-IgG-(H+L)-Alexa-Fluor-Plus-647 (1:200, Invitrogen), donkey-anti-rabbit-IgG-Alexa-Fluor-647 (1:200 Poly4064, BioLegend), goat-anti-mouse-IgG-Alexa-Fluor-488 (1:200, Invitrogen).

#### **2 Supplementary Figures, Videos and Files**

##### **2.1 Supplementary Figures**

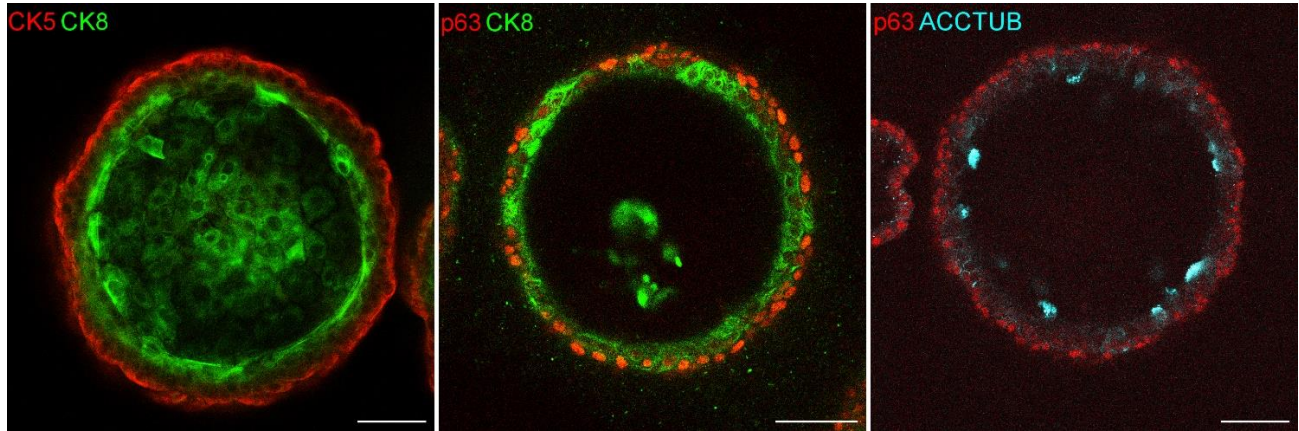

**Supplementary Figure S1:** Immunofluorescence staining of airway organoids. Airway organoids are composed of an outer layer of CK5-positive (red, left), p63-positive (red, center/right) basal cells and a luminal layer of CK8-positive (green, left/center) differentiated airway epithelial cells, some of which contain ACCTUB-positive (cyan, right) cilia. Please refer to supplementary Video S1 and supplementary Files S1-S3 for underlying 3D data. ACCTUB: acetylated alpha-tubulin; CK5: cytokeratin 5; CK8: cytokeratin 8; p63: transformation related protein 63. Scale bars: 50  $\mu$ m.

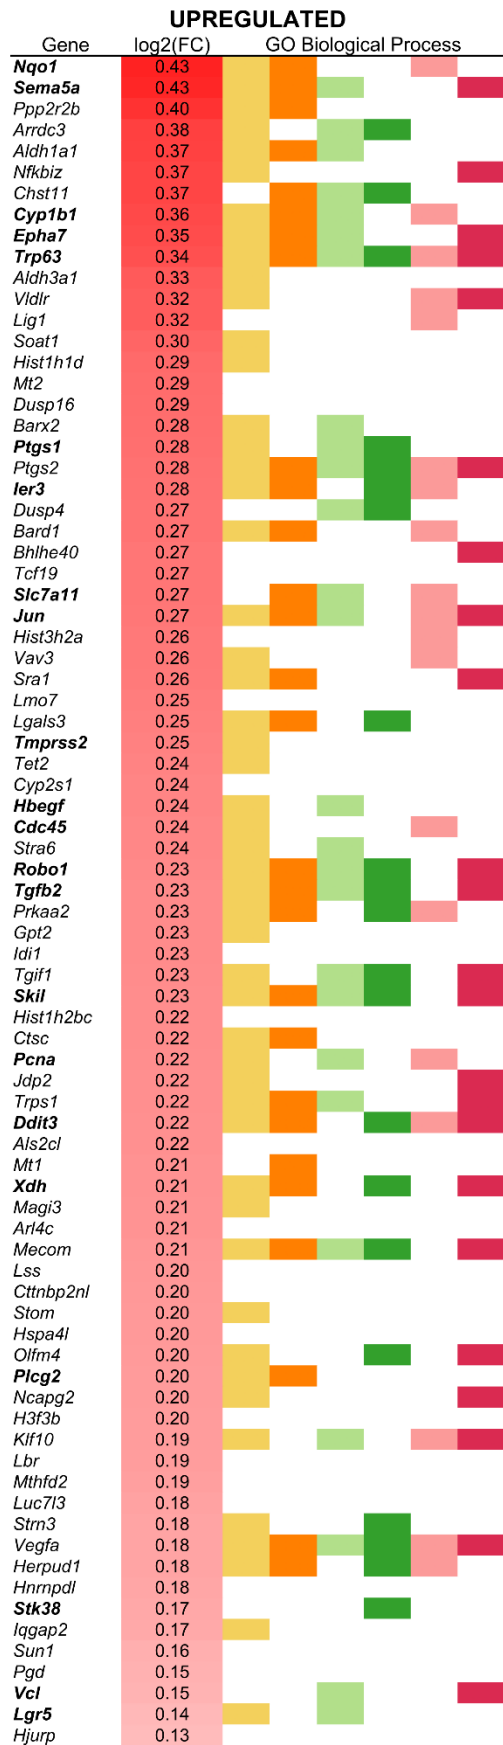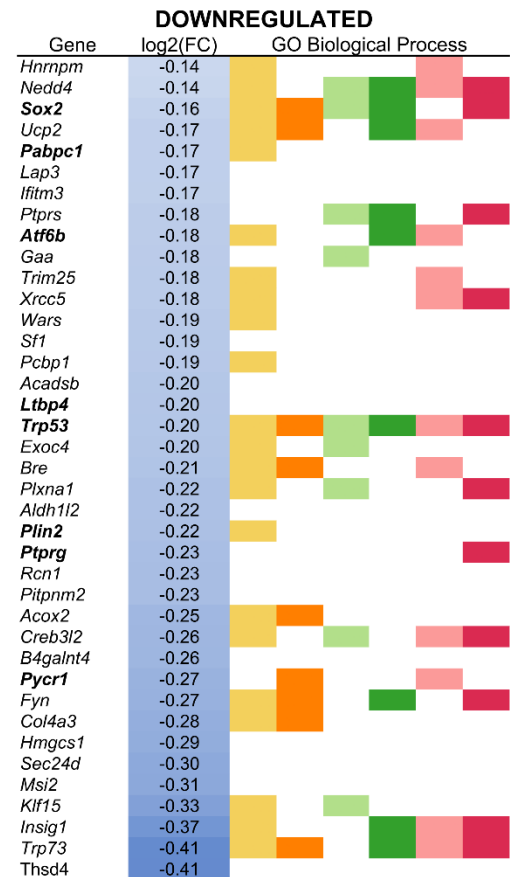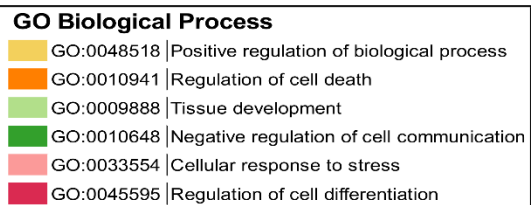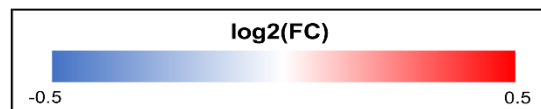

**Supplementary Figure S2:** Influence of ablation of ten cells on airway organoids' transcriptome: list of differentially expressed genes that were up- (left) or downregulated (right) within 4.5 h after damage induction, and association to the top six enriched GO biological processes. Bold-written genes were discussed to be enriched in further mentioned GO biological processes. Data analysis was performed on the basis of RNA-seq data obtained from  $n = 6$  samples per group.

## 2.2 Supplementary Videos

**Supplementary Video S1:** 3D projection of a multi-plane z-stack immunofluorescence image of an airway organoid stained for CK5 (red) and CK8 (green), as depicted in Figure S2. Individual underlying planes were captured with a distance of 2  $\mu\text{m}$  each. CK5: cytokeratin 5; CK8: cytokeratin 8. Scale bar: 50  $\mu\text{m}$ .

## 2.3 Supplementary Files

**Supplementary File S1:** Multi-plane z-stack immunofluorescence image of an airway organoid stained for CK5 (red) and CK8 (green). Individual planes were captured with a distance of 2  $\mu\text{m}$  each. CK5: cytokeratin 5; CK8: cytokeratin 8. Scale bar: 50  $\mu\text{m}$ .

**Supplementary File S2:** Multi-plane z-stack immunofluorescence image of an airway organoid stained for p63 (red) and CK8 (green). Individual planes were captured with a distance of 2  $\mu\text{m}$  each. CK8: cytokeratin 8, p63: transformation related protein 63. Scale bar: 50  $\mu\text{m}$ .

**Supplementary File S3:** Multi-plane z-stack immunofluorescence image of an airway organoid stained for p63 (red) and ACCTUB (cyan). Individual planes were captured with a distance of 2  $\mu\text{m}$  each. ACCTUB: acetylated alpha-tubulin; 63: transformation related protein 63. Scale bar: 50  $\mu\text{m}$ .
